# Supplementary material for: Delivery Mode and the Transition of Pioneering Gut-Microbiota Structure, Composition and Predicted Metabolic Function
Source: MDPI journal article supplement (doi:10.3390/genes8120364), 2017-12-04
Supplement: s1 [file s1]

**Table S1.** Summary of analyzed sequence information.

| Sample type                                                | Vaginal Delivered Neonates |                       | C-section Delivered Neonates |                      | Total                |
|------------------------------------------------------------|----------------------------|-----------------------|------------------------------|----------------------|----------------------|
|                                                            | Meconium                   | Stool                 | Meconium                     | Stool                |                      |
| <b>Number of samples</b>                                   | 13                         | 10                    | 46                           | 40                   | 109                  |
| <b>Number of sequences</b>                                 | 130,990                    | 106,891               | 473,580                      | 365,274              | 1,076,735            |
| <b>Average sequences <math>\pm</math> SD</b>               | 10,076<br>$\pm$ 3,642      | 10,689<br>$\pm$ 4,057 | 10,295<br>$\pm$ 4,128        | 9,132<br>$\pm$ 4,146 | 9,878<br>$\pm$ 4,115 |
| <b>Number of sequences yielding OTUs</b>                   | 99,157                     | 83,027                | 467,875                      | 269,314              | 827,044              |
| <b>Average sequences yielding OTUs <math>\pm</math> SD</b> | 7,627<br>$\pm$ 3,426       | 8,303<br>$\pm$ 3,388  | 8,164<br>$\pm$ 3,420         | 6,733<br>$\pm$ 3,931 | 7,588<br>$\pm$ 3,676 |
| <b>Number of OTUs</b>                                      | 2,215                      | 1,224                 | 3,871                        | 2,926                | 5,939                |
| <b>Average OTUs <math>\pm</math> SD</b>                    | 373<br>$\pm$ 169           | 205<br>$\pm$ 94       | 346<br>$\pm$ 133             | 218<br>$\pm$ 148     | 289<br>$\pm$ 156     |

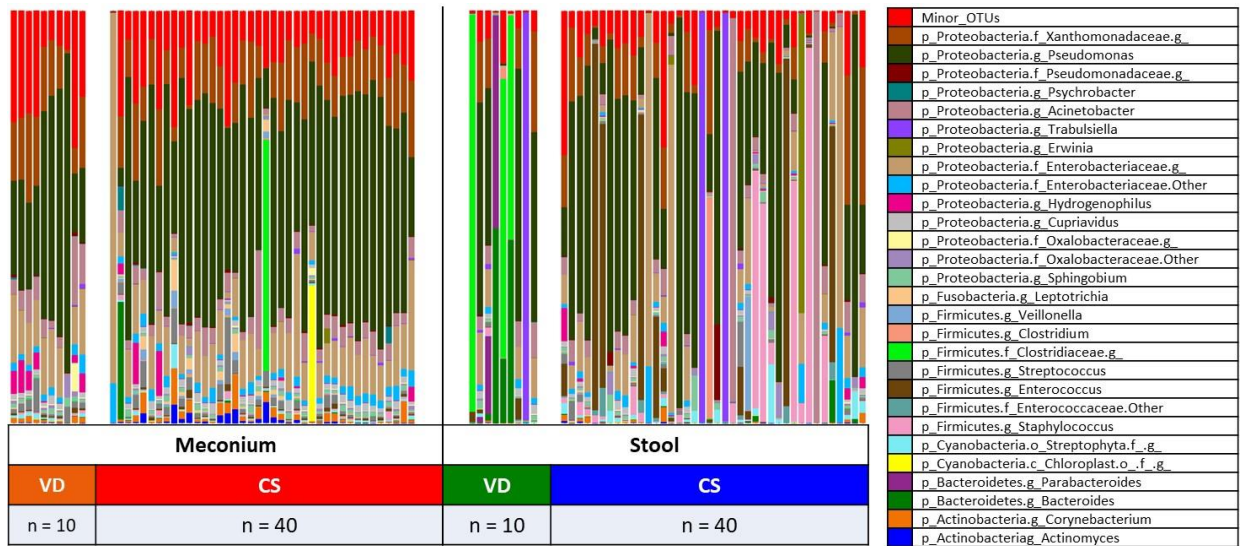

**Figure S1.** Differences in relative abundance of bacterial taxonomy in meconium or transitional stools according to mode of delivery. Bacterial taxonomic plots are shown at the lowest identifiable level, indicated by the letter preceding the underscore; f, family; g, genus. Each taxonomy (>1% of average relative abundance in any groups) is indicated by a different color at the genus level.

**(A)**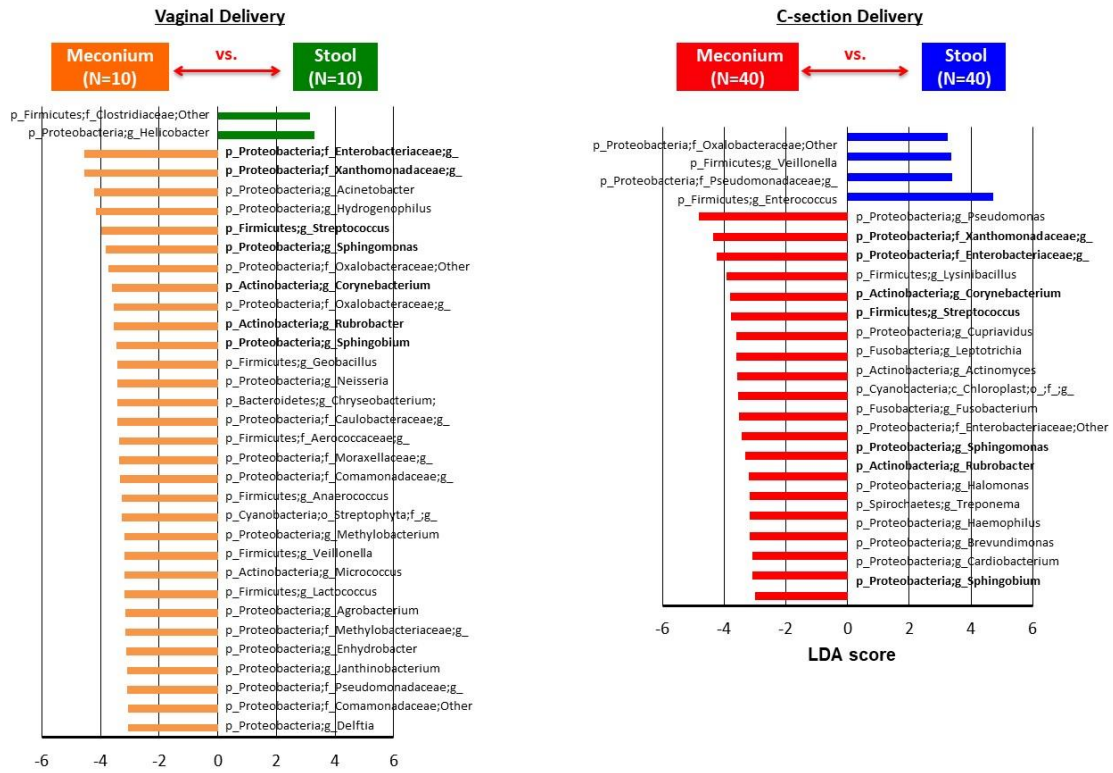**(B)**

| KO Functional Categories                  | Vaginal Delivery                            |              |      | C-section       |              |     |         |
|-------------------------------------------|---------------------------------------------|--------------|------|-----------------|--------------|-----|---------|
|                                           | Meconium (n=10)                             | Stool (n=10) |      | Meconium (n=40) | Stool (n=40) |     |         |
| Level 2                                   | Level 3                                     | P value      | LDA  | P value         | P value      | LDA | P value |
| Amino Acid Metabolism                     | Valine, Leucine and isoleucine degradation  | 0.04125      | 3.03 | -               | -            | -   | -       |
| Xenobiotics Biodegradation and Metabolism |                                             | 0.02334      | 3.47 | -               | -            | -   | -       |
| Carbohydrate Metabolism                   | Amino sugar and nucleotide sugar metabolism |              | 3.10 | 0.03429         | -            | -   | -       |
| Enzyme Families                           | Peptidases                                  |              | 3.07 | 0.04125         | -            | -   | -       |
| Carbohydrate Metabolism                   | Fructose and mannose metabolism             |              | 3.04 | 0.02837         | -            | -   | -       |

**Figure S2.** Bacterial taxa **(A)** and Predictive functional profiling **(B)** comparisons between the meconium and transitional stool according to mode of delivery. **(A)** Histogram of overrepresented taxa in each group (LDA > 3.0). Bacterial taxa detected in both of delivery mode indicates using bold. **(B)** Overrepresented metabolic routes in predicted metagenomes were detected using LDA Effect Size (>3.0-fold) test.
